CORRECTION

## Correction: Evaluating the long-term strength of GGBFS-blended cement across various water-to-binder and superplasticizer ratios under heating/cooling cycles

Bashdar Omer, Najmadeen Mohammed Saeed, Mahmood Hunar Dheyaaldin, Ahmed Salah Jamal, Rawaz Kurda

There are errors in the author affiliations. The correct affiliations are as follows:

Bashdar Omer<sup>1</sup>, Najmadeen Mohammed Saeed<sup>1</sup>, Mahmood Hunar Dheyaaldin<sup>2,3</sup>, Ahmed Salah Jamal<sup>4</sup>, Rawaz Kurda<sup>5</sup>

**1** Civil Engineering Department, University of Raparin, Rania, Iraq, **2** Department of Civil Engineering, Cihan University-Erbil, Erbil, Iraq, **3** Department of Civil Engineering, American University in Dubai, UAE, **4** Civil Engineering Department, Faculty of Engineering, Tishk International University, Erbil, Iraq, **5** Department of Highway and Bridge Engineering, Technical Engineering College, Erbil Polytechnic University, Erbil, Iraq.

### Reference

1. Omer B, Saeed NM, Dheyaaldin MH, Jamal AS, Kurda R. Evaluating the long-term strength of GGBFS-blended cement across various water-to-binder and superplasticizer ratios under heating/cooling cycles. PLoS One. 2025;20(7):e0319923. <https://doi.org/10.1371/journal.pone.0319923> PMID: [40705809](https://pubmed.ncbi.nlm.nih.gov/40705809/)

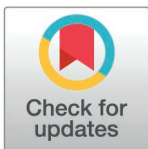

### OPEN ACCESS

**Citation:** Omer B, Saeed NM, Dheyaaldin MH, Jamal AS, Kurda R (2025) Correction: Evaluating the long-term strength of GGBFS-blended cement across various water-to-binder and superplasticizer ratios under heating/cooling cycles. PLoS One 20(11): e0335994. <https://doi.org/10.1371/journal.pone.0335994>

**Published:** November 3, 2025

**Copyright:** © 2025 Omer et al. This is an open access article distributed under the terms of the [Creative Commons Attribution License](https://creativecommons.org/licenses/by/4.0/), which permits unrestricted use, distribution, and reproduction in any medium, provided the original author and source are credited.
